# Supplementary material for: Workplace Violence and Associated Factors Among Healthcare Professionals in Public Hospitals of Addis Ababa, Ethiopia: A Cross-Sectional Study
Source: Research Square preprint supplement (doi:10.21203/rs.3.rs-6544692/v1), 2025-05-14
Supplement: Supplementary file 1 [file a74b03e3d67958f70ce7c2d5.docx]

Work place violence Questioner

# Annex

**PERSONAL AND WORKPLACE DATA**

1. Age ________
2. Sex A. female B. male
3. What is your marital status: A. single B. married C. living with partner D. separated /divorced E. widow/widower
4. Which category best describes your present professional group: A. physician B. nurse C. midwife D. pharmacist E. health officer F. other please specify ___________
5. How many years of work experience in the health sector do you presently have in years: ____
6. Do you work in shifts A. yes B. no
7. Do you interact with patients/clients during your work? A. Yes B. No
8. Do you have routine direct physical contact (washing, turning, lifting) with patients/clients? A. yes B. no
9. Where do you spend most of your time (more than 50%) in your main job? Please choose the work setting that describes it best. A. out patient B. In patient medicine C. In patient surgery D. In patient gynecology E. In patient pediatrics F. psychiatry G. Emergency H . specialized unit (e.g. Oncology, orthopedics, radiology) I. operating room J. intensive care K. management L. technical services (laboratory, sterilization, IPC..) M. Other please specify____________
10. The number of staff present in the same work setting (area) with you during most (more than 50%) of your work time is:_______
11. Are there procedures for the reporting of violence in your workplace that you know of ? A. yes B. no

**PHYSICAL WORKPLACE VIOLENCE**

Please note – Physical violence is the use of physical force against another person or group that results in physical, sexual, or psychological harm. Includes beating, kicking, slapping, stabbing, shooting, pushing, biting, and pinching, among others

1. In the last 12 months, have you been physically attacked in your workplace? A. Yes B. No, if no please go to question number 2

1.1. If yes, please think of the last time that you were physically attacked in your place of work. How would you describe this incident? A. Physical violence without a weapon B. Physical violence with a weapon

1.2. Do you consider this to be a typical incident of violence in your workplace? A. Yes B. No

1.3. Who attacked you? A. patient B. relatives of patient/attendant C. staff member D. management / supervisor E. external colleague/worker F. general public G. other, please specify:__________________

1.4. How did you respond to the incident? Please tick all relevant answers A. took no action B. tried to pretend it never happened C. told the person to stop D. tried to defend myself physically E. told friends/family F. sought counselling G. told a colleague H. reported it to a senior staff member I. transferred to another position J. sought help from association K. completed incident/accident form L. pursued prosecution M. completed a compensation claim N. other:_______________

1.5. Do you think the incident could have been prevented? A. yes B.no

1.6. Were you injured as a result of the violent incident? A. Yes B. No If no go to Q1.7

1.6.1. IF YES, did you require formal treatment for the injuries? A. Yes B. No

1.7. Did you have to take time off from work after being attacked? A. Yes B. No

1.8.Was any action taken to investigate the causes of the incident? A. yes B. no C. don’t know , If no or don’t know please go to question 1.9

1.8.1. IF YES, by whom: A. management / employer B. associations C. community group D. police E. other, please specify_______________

1.8.2. What were the consequences for the attacker? A. none B. verbal warning issued C. care discontinued D. reported to police E. aggressor prosecuted F. don't know G. other:______________

1.9. If you did not report or tell about the incident to others, why not? Please tick every relevant box A. It was not important B. Felt ashamed C. felt guilty D. afraid of negative consequences E. useless F. did not know who to report to G. Other, please specify ____________

2. In the last 12 months, have you witnessed incidents of physical violence in your workplace? A. Yes B. No if NO, please go to question 3

2.1.If YES, how often has this occurred in the last 12 months? A. Once B. 2-4 times C. 5-10 times D. Several times a month E. About once a week F. Daily

3. Have you reported an incident of workplace violence in the last 12 months? (witnessed or experienced) A. yes B. no If NO, please go to section: PSYCHOLOGICAL VIOLENCE

3.1. IF YES, have you been disciplined for reporting an incident of workplace violence? A. yes B. no

**PSYCHOLOGICAL WORKPLACE VIOLENCE (Emotional Abuse)**

Please note: Psychological violence is defined as: Intentional use of power, including threat of physical force, against another person or group, that can result in harm to physical, mental, spiritual, moral or social development. Psychological violence includes verbal abuse, bullying/mobbing, harassment, and threats.

1. VERBAL ABUSE

Please note- Verbal abuse- is defined as extremely critical, threatening, or insulting words delivered in oral or written form and intended to demean, belittle, or frighten the recipient

1. In the last 12 months, have you been verbally abused in your workplace? A. Yes, please answer the following questions B. No, please go to section BULLYING / MOBBING

2. How often have you been verbally abused in the last 12 months? A. all the time B. sometimes C. once

3. Please think of the last time you were verbally abused in your place of work. Who verbally abused you? A. patient B. relatives of patient C. staff member D. management / supervisor E. external colleague/worker F. general public G. other________________

4. Do you consider this to be a typical incident of verbal abuse in your workplace? A. Yes B. No

5. How did you respond to the verbal abuse? Please tick all relevant answers A. took no action B. tried to pretend it never happened C. told the person to stop D. told friends/family E. told a colleague F. reported it to a senior staff member G. sought counselling H. sought help from the association I. transferred to another position J. completed incident/accident form K. pursued prosecution L. completed a compensation claim M. other___________

6. Do you think the incident could have been prevented? A. yes B. no

7. Was any action taken to investigate the causes of the verbal abuse? A. yes B. no C. don’t know If NO or DON’T KNOW, please go to question 8

7.1. If YES, by whom: (please tick every relevant box) A. management / employer B. association C. community group D. police E. other_____________

7.2. If YES, what were the consequences for the abuser? A. none B. verbal warning issued C. care discontinued D. reported to police E. aggressor prosecuted F. other_____________

8. If you did not report or tell about the incident to others, why not? Please tick every relevant box A. it was not important B. Felt ashamed C. felt guilty D. afraid of negative consequences E. did not know who to report to F. useless G. other________

II. BULLYING / MOBBING

1.In the last 12 months, have you been bullied / mobbed in your workplace? A. Yes , please answer the following questions B. No , please go to section SEXUAL HARASSMENT

2. How often have you been bullied / mobbed in the last 12 months? A. all the time B. sometimes C. once

3. Please think of the last time you were bullied / mobbed in your place of work. Who bullied / mobbed you? A. patient B. relatives of patient C. staff member D. management / supervisor E. external colleague/worker F. general public G. other: ___

4. Do you consider this to be a typical incident of bullying / mobbing in your workplace? A. Yes B. No

5. How did you respond to the bullying / mobbing? Please tick all relevant answers A. took no action B. tried to pretend it never happened C. told the person to stop D. told friends/family E. told a colleague F. reported it to a senior staff member G. sought counselling H. sought help from the association I. transferred to another position J. completed incident/accident form K. pursued prosecution L. completed a compensation claim M. other: __________

6. Do you think the incident could have been prevented? A. yes B. no

7. Was any action taken to investigate the causes of the bullying/mobbing? A. yes B. no C. don’t know If NO or DON’T KNOW, please go to question 7

7.1. If YES, by whom: A. management/employer B. association C. community group D. police E. other________

7.2. If YES, what were the consequences for the person who bullied / mobbed you? A. none B. verbal warning issued C. care discontinued D. reported to police E. aggressor prosecuted F. don't know G. other: ____________________

8. If you did not report or talk about the incident to others, why not? Please tick every relevant box A. it was not important B. Felt ashamed C. felt guilty D. afraid of negative consequences E. did not know who to report to F. useless G. other____________

**III. SEXUAL HARASSMENT**

Please note - Sexual violence **is** any sexual act, attempt to obtain a sexual act, or other act directed against a person’s sexuality using coercion, by any person regardless of their relationship to the victim, in any setting. It includes rape, defined as the physically forced or otherwise coerced penetration of the vulva or anus with a penis, other body part or object, attempted rape, unwanted sexual touching, and other non-contact forms.

1. In the last 12 months, have you been sexually harassed in your workplace? A. Yes , please answer the following questions B. No
2. How often have you been sexually harassed in the last 12 months? A. all the time B. sometimes C. once
3. Please think of the last time you were sexually harassed in your place of work. Who sexually harassed you? A. patient B. relatives of patient C. staff member D. management / supervisor E. external colleague/worker F. general public G. other________________
4. Do you consider this to be a typical incident of sexual harassment in your workplace? A. Yes B. No
5. How did you respond to the sexual harassment? Please tick all relevant answers A. took no action B. tried to pretend it never happened C. told the person to stop D. told friends/family E. told a colleague F. reported it to a senior staff member G. sought counselling H. sought help from the association I. transferred to another position J. completed incident/accident form K. pursued prosecution L. completed a compensation claim M. other: ____________
6. Do you think the incident could have been prevented? A. yes B. no
7. Was any action taken to investigate the causes of the sexual harassment? A. yes B. no C. don’t know If NO or DON’T KNOW, please go to question 8

7.1. If YES, by whom: A. management / employer B. association C. community group D. police E. other________

7.2. If YES, what were the consequences for the person who harassed you? A. none B. verbal warning issued C. care discontinued D. reported to police E. aggressor prosecuted F. don't know G. other: ____________________

1. . If you did not report or talk about the incident to others, why not? Please tick every relevant box A. it was not important B. Felt ashamed C. felt guilty D. afraid of negative consequences E. did not know who to report to F. useless G. other____________
